# Supplementary material for: PD-L1 Expression Induced by the 2009 Pandemic Influenza A(H1N1) Virus Impairs the Human T Cell Response
Source: Hindawi journal article supplement (doi:10.1155/2013/989673), 2013-01-01

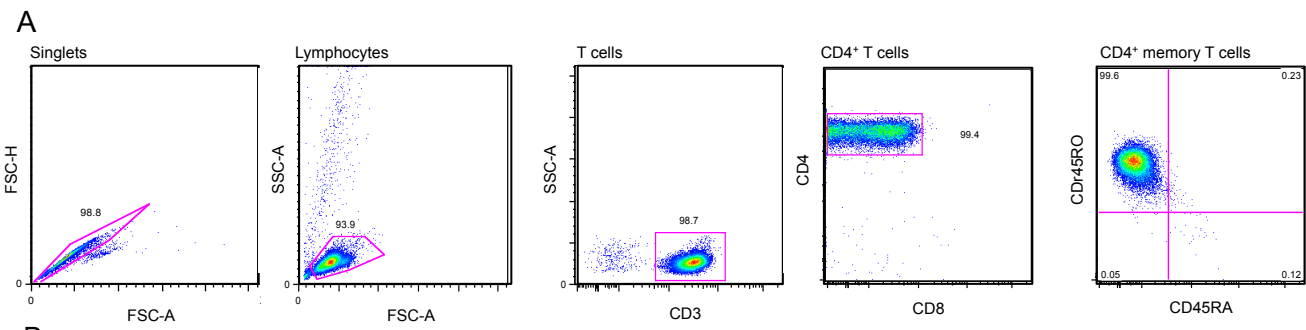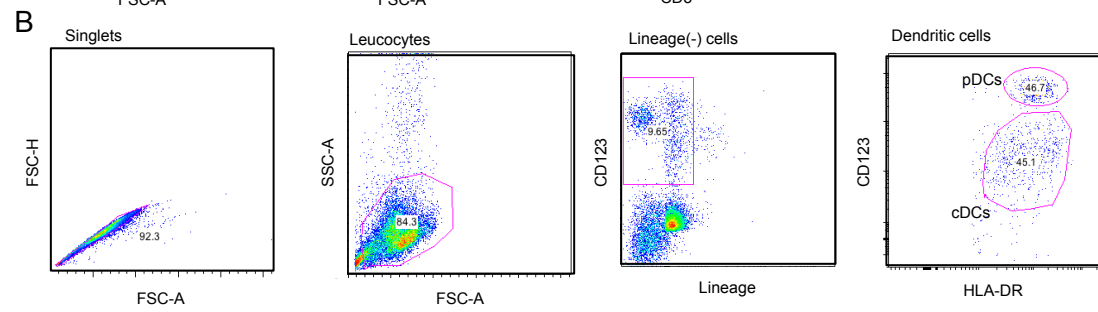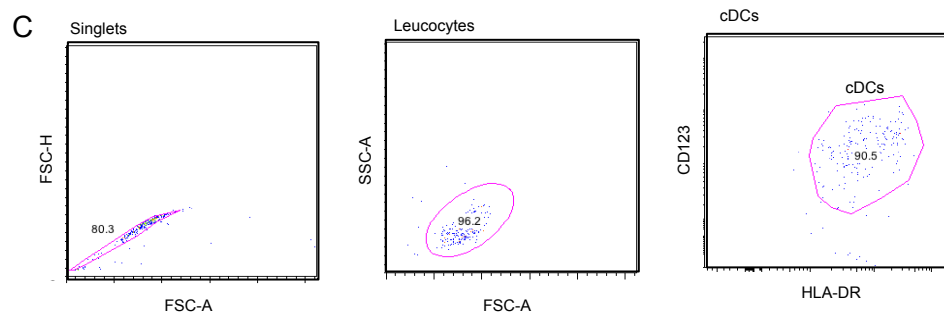

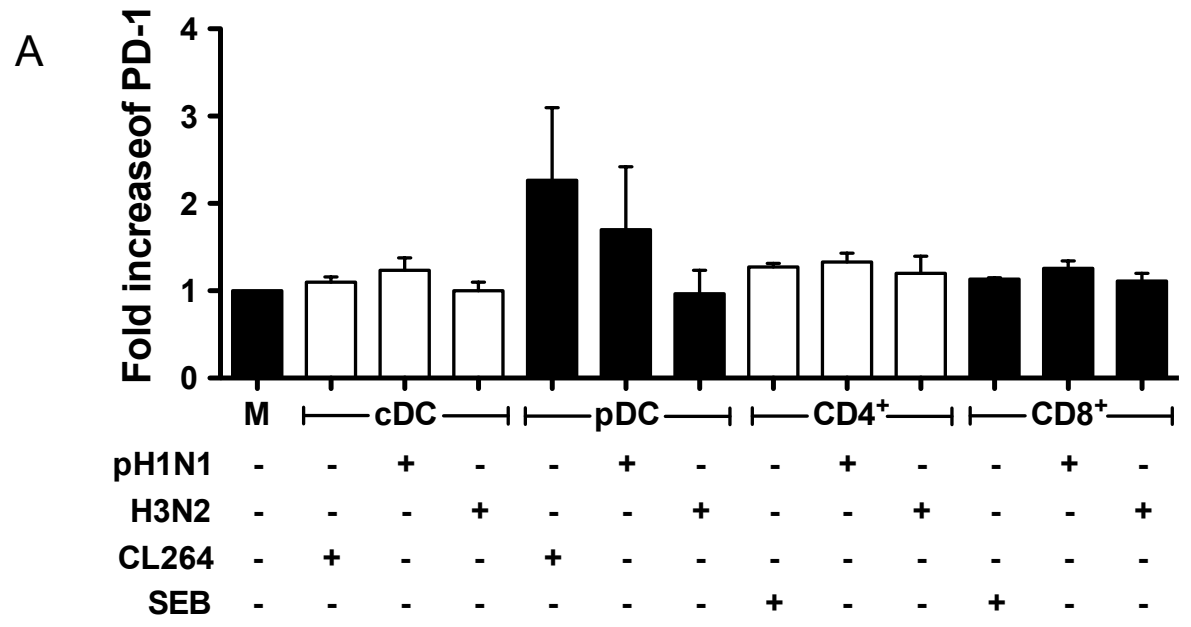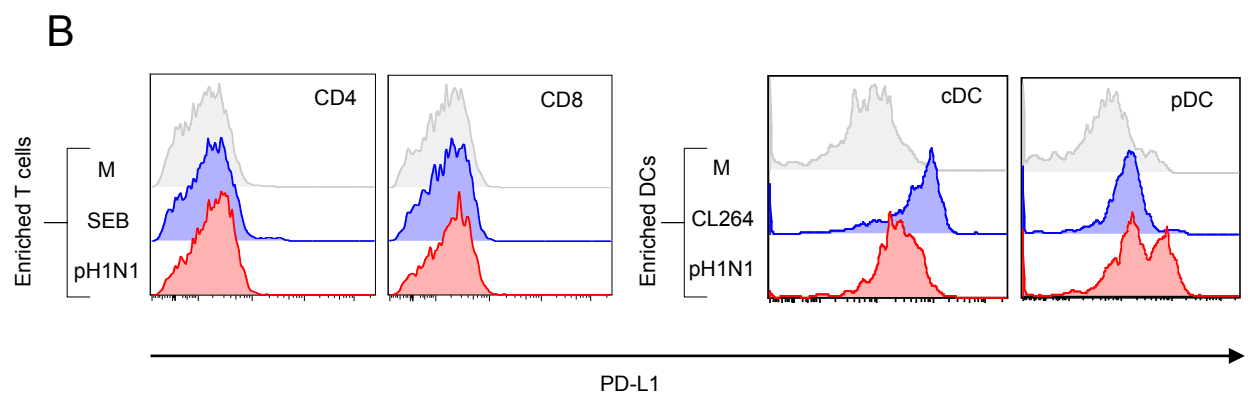

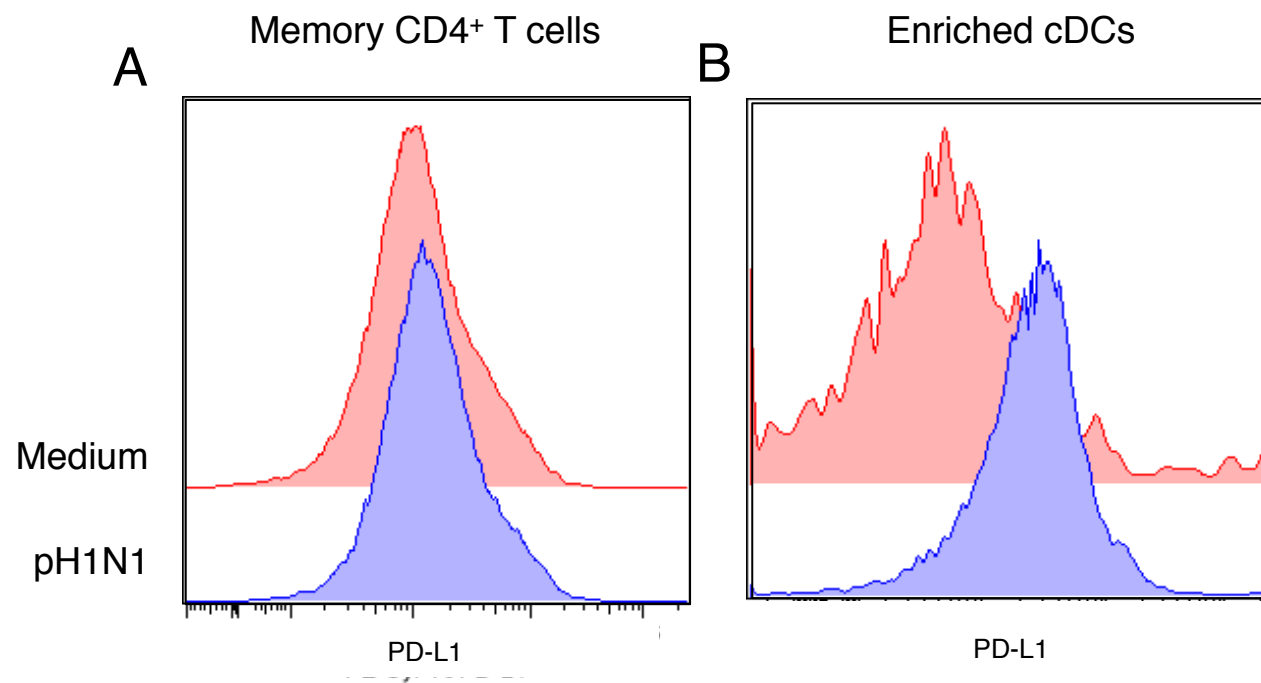

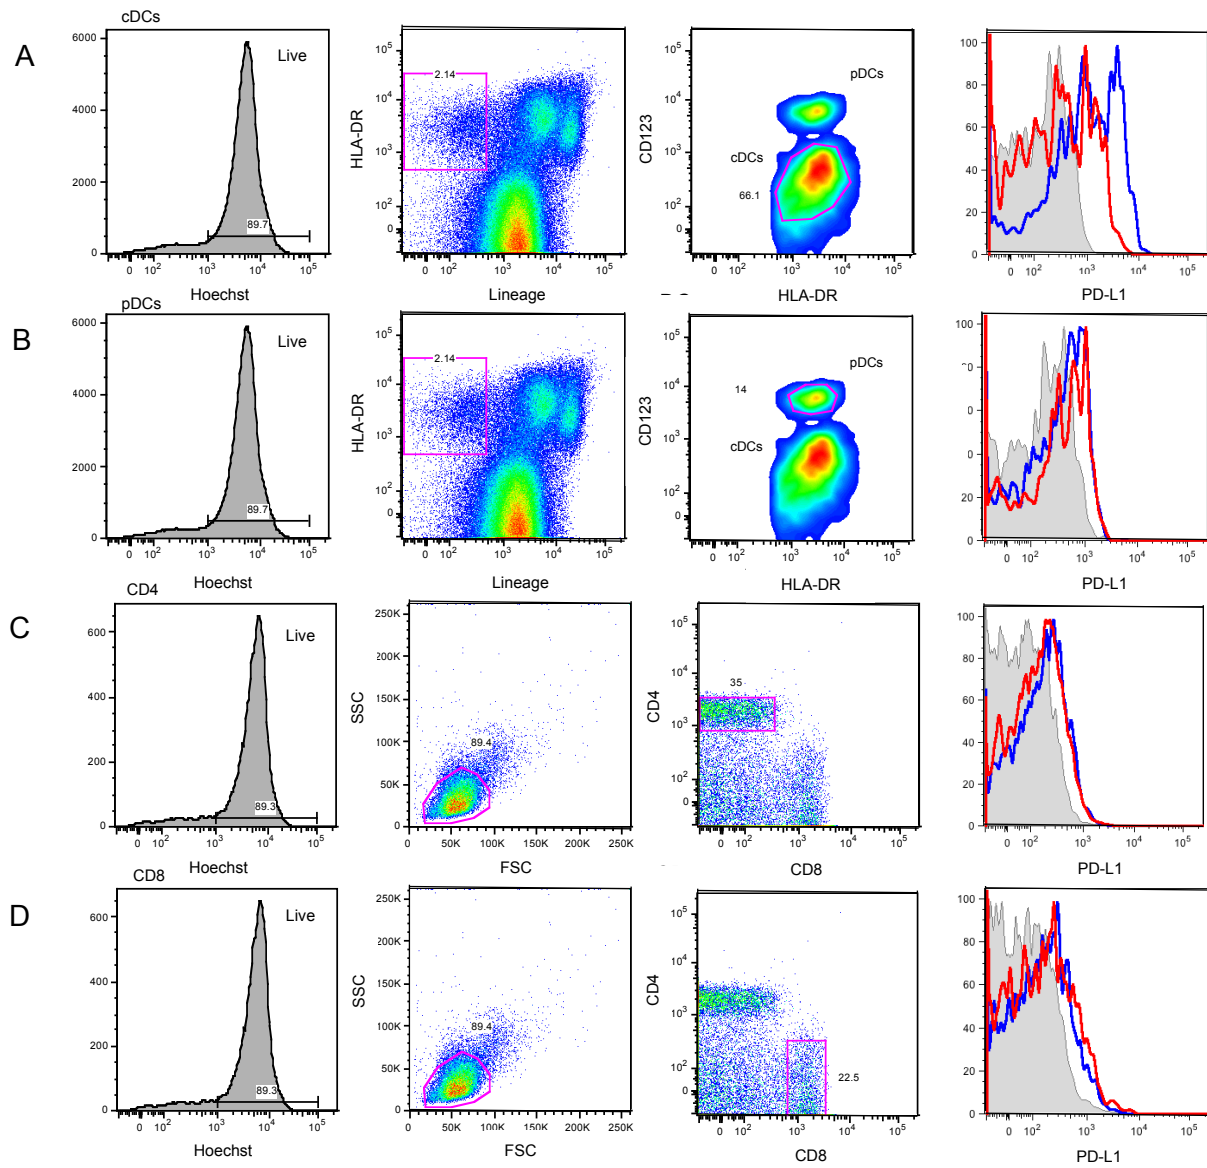

Supplement: f1 [file 989673.f1.pdf]
